# Supplementary material for: Characterization of a Mouse-Adapted Staphylococcus aureus Strain
Source: PLoS One. 2013 Sep 2;8(9):e71142. doi: 10.1371/journal.pone.0071142 (PMC3759423; doi:10.1371/journal.pone.0071142)
Supplement: Table S1 — Complete DNA microarray results for JSNZ and human CC88 isolates. (XLSX) [file pone.0071142.s001.xlsx]

## Sheet: SupplTable 1
		JSNZ_ST88	M3_ST88	M25_ST88	F25_ST88	A50_ST78	A7_ST78	Newman_ST8
MRSA / PVL
MRSA (mecA)		-	-	-	-	-	-	-
PVL		-	-	-	-	-	-	-
SCC-type		-	-	-	-	-	-	-
Species Markers / Regulatory Genes
23S-rRNA	23S-rRNA Gene	+	+	+	+	+	+	+
gapA	Glyceraldehyde 3-phosphate Dehydrogenase	+	+	+	+	+	+	+
katA	Catalase	+	+	+	+	+	+	+
coA	Coagulase	+	+	+	+	+	+	+
Protein A	Staphylococcus Protein A	+	+	+	+	+	+	+
sbi	IgG-binding protein	+	+	+	+	+	+	+
nuc	Thermostable Nuclease (DNAse)	+	+	+	+	+	+	+
fnbA	Fibronectin-binding Protein A	+	+	+	+	+	+	+
vraS	vraS Sensor Protein	+	+	+	+	+	+	+
sarA	Staphylococcal Accessory Regulator A	+	+	+	+	+	+	+
eno	Enolase, Phosphopyruvate Hydratase	+	+	+	+	+	+	+
saeS	Histidine Protein Kinase (sae Locus)	+	+	+	+	+	+	+
Resistance Genotype
mecA	Methicillin, Oxacillin and all Beta-Lactams, defining MRSA	-	-	-	-	-	-	-
blaZ	Beta-Laktamase	-	+	+	-	+	+	-
blaI	Beta Lactamase Repressor (Regulatory Protein)	-	+	+	-	+	+	-
blaR	Beta Lactamase Regulatory Protein	-	+	+	-	+	+	-
ermA	Macrolide, Lincosamide, Streptogramin	-	-	-	-	-	+	-
ermB	Macrolide, Lincosamide, Streptogramin	-	-	-	-	-	-	-
ermC	Macrolide, Lincosamide, Streptogramin	-	-	-	-	-	-	-
linA	Lincosamides	-	-	-	-	-	-	n.d.
msrA	Macrolide	-	-	-	-	-	-	-
mefA	Macrolide	-	-	-	-	-	-	-
mpbBM	Macrolide	-	-	-	-	-	-	n.d.
vatA	Streptogramine	-	-	-	-	-	-	-
vatB	Streptogramine	-	-	-	-	-	-	-
vga	Streptogramine	-	-	-	-	-	-	-
vgaA	Streptogramine	-	-	-	-	-	-	-
vgb	Streptogramine	-	-	-	-	-	-	-
aacA-aphD	Aminoglycoside (Gentamicin, Tobramycin)	-	-	-	-	-	-	n.d.
aadD	Aminoglycoside (Tobramycin, Neomycin)	-	-	-	-	-	-	n.d.
aphA	Aminoglycoside (Kanamycin, Neomycin)	-	-	-	-	-	-	n.d.
sat	Streptothricin	-	-	-	-	-	-	-
dfrA	Trimethoprim	-	-	-	-	-	-	n.d.
far	Fusidic acid	-	-	-	-	-	-	-
Q6GD50	Putative Fusidic Acid Resistance Protein	-	-	-	-	-	-	-
mupR	Mupirocin	-	-	-	-	-	-	-
tetK	Tetracycline	-	-	-	-	-	-	-
tetM	Tetracycline	-	-	-	-	-	-	-
tetEfflux	Tetracyclin Efflux Protein (Putative Transport Protein)	+	+	+	+	+	+	n.d.
cat	Chloramphenicol	-	-	-	-	-	-	-
fexA	Chloramphenicol	-	-	-	-	-	-	-
cfr	Phenicols, Lincosamides, Oxazolidinones (Linezolid), Pleuromutilins, Streptogramin A	-	-	-	-	-	-	-
fosB	Putative Marker For Fosfomycin, Bleomycin	-	-	-	-	-	-	+
fosB-plasmid		-	-	-	-	-	-	-
vanA	Vancomycin	-	-	-	-	-	-	-
vanB	Vancomycin	-	-	-	-	-	-	-
vanZ	Vancomycin	-	-	-	-	-	-	-
mercury resistance locus	Mercury resistance operon	-	-	-	-	-	-	n.d.
qacA	Unspecific efflux pump	-	+	+	-	-	-	-
qacC	Unspecific efflux pump	-	-	-	-	-	-	-
Virulence Genotype
tst-all	Toxic Shock Syndrome Toxin	-	-	-	-	-	-	-
tst-1	Toxic Shock Syndrome Toxin	-	-	-	-	-	-	-
tst-RF122	Toxic Shock Syndrome Toxin, allele from bovine strains	-	-	-	-	-	-	-
entA-all	Enterotoxin A	-	-	-	-	-	-	+
entA	Enterotoxin A	-	-	-	-	-	-	+
entA-320E	Enterotoxin A, allele from 320E	-	-	-	-	-	-	-
entA-N315 / entP	Enterotoxin A, allele from N315	-	-	-	-	-	-	-
entB	Enterotoxin B	-	-	-	-	-	-	-
entC	Enterotoxin C	-	-	-	-	-	-	-
entCM14	Enterotoxin -like Protein (ORF CM14 of U10927.2)	-	-	-	-	-	-	-
entD	Enterotoxin D	-	-	-	-	-	-	-
entE	Enterotoxin E	-	-	-	-	-	-	-
entG	Enterotoxin G	-	-	-	-	-	-	-
entH	Enterotoxin H	-	-	-	-	-	-	-
entI	Enterotoxin I	-	-	-	-	-	-	-
entJ	Enterotoxin J	-	-	-	-	-	-	-
entK	Enterotoxin K	-	-	-	-	-	-	-
entL	Enterotoxin L	-	-	-	-	-	-	-
entM	Enterotoxin M	-	-	-	-	-	-	-
entN	Enterotoxin N	-	-	-	-	-	-	-
entN_1	Enterotoxin N - other than RF122	-	-	-	-	-	-	-
entO	Enterotoxin O	-	-	-	-	-	-	-
entQ	Enterotoxin Q	-	-	-	-	-	-	-
entR	Enterotoxin R	-	-	-	-	-	-	-
entU	Enterotoxin U	-	-	-	-	-	-	-
egc-cluster	Enterotoxins seg/sei/sem/sen/seo/seu	-	-	-	-	-	-	-
PVL	Pantone-Valentine Leukocidin	-	-	-	-	-	-	-
lukM/lukF-P83	Bovine Leukocidin	-	-	-	-	-	-	-
lukF	Haemolysin Gamma, Component B	+	+	+	+	+	+	+
lukS-all	Haemolysin Gamma, Component C	+	+	+	+	+	+	+
lukS	Haemolysin Gamma, Component C	+	+	+	+	+	+	+
lukS-ST22+ST45	Haemolysin Gamma, Component C, allele from ST22 and ST45	+/-	+/-	+/-	+/-	+/-	+	-
hlgA	Haemolysin Gamma, Component A	+	+	+	+	+	+	+
lukD	Leukocidin D Component	+	+	+	+	+	+	+
lukE	Leukocidin E Component	+	+	+	+	+	+	+
lukX	Leukocidin/Haemolysin Toxin Family Protein	+	+	+	+	+	+	+
lukY-all	Leukocidin/Haemolysin Toxin Family Protein	+	+	+	+	+	+	+
lukY-var1	Leukocidin/Haemolysin Toxin Family Protein	+	+	+	+	+	+	+
lukY-var2	Leukocidin/Haemolysin Toxin Family Protein, allele from MRSA252	-	-	-	-	-	-	-
hl	Hypothetical Protein similar to Haemolysin	+	+	+	+	+	+	+
hla	Haemolysin Alpha (Alpha Toxin)	+	+	+	+	+	+	+
hld	Haemolysin Delta (Amphiphylic Membrane Toxin)	+	+	+	+	+	+	+
hlIII	Putative Haemolysin III	+	+	+	+	+	+	+
hl_III_Other than RF122	Putative Haemolysin III (other than RF122)	+	+	+	+	+	+	+
hlb	Haemolysine Beta (Phospholipase C)	+	+	+	+	+	+	+
un-truncated hlb	Haemolysine Beta (Phospholipase C / un-truncated)	+	-	-	-	+/-	+/-	-
sak	Staphylokinase	-	+	+	+	+	+	+
chp(CHIPS)	Chemotaxis Inhibitory Protein (CHIPS)	-	-	-	-	-	+/-	+
scn	Staphylococcal Complement Inhibitor (SCIN)	-	+	+	+	+	+	+
etA	Exfoliative Toxin A	-	-	+	-	-	-	-
etB	Exfoliative Toxin B	-	-	-	-	-	-	-
etD	Exfoliative Toxin D	-	-	-	-	-	-	-
edinA	Epidermal cell differentiation inhibitor A	-	-	-	-	-	-	-
edinB	Epidermal cell differentiation inhibitor B	-	-	-	-	-	-	-
edinC	Epidermal cell differentiation inhibitor C	-	-	-	-	-	-	-
aur-all	Aureolysin	+	+	+	+	+	+	+
aur	Aureolysin	+	+	+	+	+	+	+
aur - OtherThan252	Aureolysin, allele from other than MRSA252	+	+	+	+	+	+	+
aur-MRSA252	Aureolysin, allele from MRSA252	-	-	-	-	-	-	-
splA	Serine Protease A	+	+	+	+	+	+	+
splB	Serine Protease B	+	+	+	+	+	+	+
splE	Serine Protease E	-	-	-	-	-	-	+
sspA	Glutamyl Endopeptidase / V8-Protease	+	+	+	+	+	+	+
sspB	Staphopain B	+	+	+	+	+	+	+
sspP	Staphopain A (Staphylopain A)	+	+	+	+	+	+	+
ACME-locus	Arginine catabolic mobile element	-	-	-	-	-	-	-
arcA-SCC	arginine deiminase	-	-	-	-	-	-	-
arcB-SCC	ornithine transcarbamoylase	-	-	-	-	-	-	-
arcC-SCC	carbamate kinase, locus 2	-	-	-	-	-	-	-
arcD-SCC	arginine/ornithine antiporter	-	-	-	-	-	-	-
agr typing
agrI	Accessory Gene Regulator - Type 1	-	-	-	-	-	-	+
agrII	Accessory Gene Regulator - Type 2	-	-	-	-	-	-	-
agrIII	Accessory Gene Regulator - Type 3	+	+	+	+	+	+	-
agrIV	Accessory Gene Regulator - Type 4	-	-	-	-	-	-	-
SCCmec-Typing
mecA	Methicillin, Oxacillin and all Beta-Lactams, defining MRSA	-	-	-	-	-	-	-
mecR	Signal Transducer Protein MecR1	-	-	-	-	-	-	-
mecR_truncated	Signal Transducer Protein MecR1 - truncated	-	-	-	-	-	-	-
mecI	Methicillin-Resistance Regulatory Protein	-	-	-	-	-	-	-
ugpQ	Glycerophosphoryl-diester-Phosphodiesterase (next to mecA)	-	-	-	-	-	-	-
ccrA-1	Cassette Chromosome Recombinase A, type 1	-	-	-	-	-	-	-
ccrA-2	Cassette Chromosome Recombinase A, type 2	-	-	-	-	-	-	-
ccrA-3	Cassette Chromosome Recombinase A, type 3	-	-	-	-	-	-	-
ccrAA-MRSAZH47	Cassette Chromosome Recombinase A, type ZH47	-	-	-	-	-	-	-
ccrA-4	Cassette Chromosome Recombinase A, type 4	-	-	-	-	-	-	-
ccrB-1	Cassette Chromosome Recombinase B, type 1	-	-	-	-	-	-	-
ccrB-2	Cassette Chromosome Recombinase B, type 2	-	-	-	-	-	-	-
ccrB-3	Cassette Chromosome Recombinase B, type 3	-	-	-	-	-	-	-
ccrB-4	Cassette Chromosome Recombinase B, type 4	-	-	-	-	-	-	-
ccrC	Cassette Chromosome Recombinase C	-	-	-	-	-	-	-
merA	Mercuric Reductase (SCCmec type III)	-	-	-	-	-	-	-
merB	Alkylmercury Lyase (SCCmec type III)	-	-	-	-	-	-	-
kdpA-SCC	Potassium-transporting ATPase A chain	-	-	-	-	-	-	-
kdpB-SCC	Potassium-transporting ATPase B chain	-	-	-	-	-	-	-
kdpC-SCC	Potassium-transporting ATPase C chain	-	-	-	-	-	-	-
kdpD-SCC	Sensor Histidine Kinase (Sensor Protein located in kdp operon)	-	-	-	-	-	-	-
kdpE-SCC	KDP Operon Transcriptional Regulatory Protein (DNA-binding Response Regulator)	-	-	-	-	-	-	-
plsSCC-COL	plasmin-sensitive surface protein	-	-	-	-	-	-	-
Q9XB68-dcs	Hypothetical Protein Historical Name: CN050 Synonyms: dcs	-	-	-	-	-	-	-
xylR	Pseudogene of Xylose Repressor	-	-	-	-	-	-	-
Capsule / Biofilm
capsule-1	Capsule Type 1	-	-	-	-	-	-	-
capsule-5	Capsule Type 5	-	-	-	-	-	-	+
capsule-8	Capsule Type 8	+	+	+	+	+	+	-
capH1	Capsular Polysaccharide Synthesis Enzyme CapH Capsule type 1	-	-	-	-	-	+/-	-
capJ1	O-Antigen Polymerase CapJ Capsule Type 1	-	-	-	-	-	-	-
capK1	Capsular Polysaccharide Biosynthesis Protein CapK Capsule Type 1	-	-	-	-	-	+/-	-
capH5	Capsular Polysaccharide Synthesis Enzyme CapH Capsule type 5	-	-	-	-	-	-	+
capJ5	O-Antigen Polymerase CapJ Capsule Type 5	-	-	-	-	-	-	+
capK5	Capsular Polysaccharide Biosynthesis Protein CapK Capsule Type 5	-	-	-	-	-	-	+
capH8	Capsular Polysaccharide Synthesis Enzyme CapH Capsule type 8	+	+	+	+	+	+	-
capI8	Capsular Polysaccharide Synthesis Enzyme CapI Capsule type 8	+	+	+	+	+	+	-
capJ8	O-Antigen Polymerase CapJ Capsule Type 8	+	+	+	+	+	+	-
capK8	Capsular Polysaccharide Biosynthesis Protein CapK Capsule Type 8	+	+	+	+	+	+	-
icaA	Intercellular Adhesion Protein A (N-glycosyltransferase)	+	+	+	+	+	+	+
icaC	Intercellular Adhesion Protein C	+	+	+	+	+	+	+
icaD	Biofilm PIA Synthesis Protein D	+	+	+	+	+	+	+
bap	Surface Protein Involved In Biofilm Formation	-	-	-	-	-	-	-
MSCRAMMs / Adhaesion Factors
bbp-all	Bone Sialoprotein-Binding Protein	+	+	+	+	+	+	+
bbp-COL+MW2	Bone Sialoprotein-Binding Protein, allele from COL and MW2	-	-	-	-	-	+/-	+
bbp-MRSA252	Bone Sialoprotein-Binding Protein, allele from MRSA252	-	-	-	-	-	-	-
bbp-Mu50	Bone Sialoprotein-Binding Protein, allele from Mu50	+	+	+	+	+	+	-
bbp-RF122	Bone Sialoprotein-Binding Protein, allele from RF122	-	-	-	-	-	-	-
bbp-ST45	Bone Sialoprotein-Binding Protein, allele from ST45	-	-	-	-	-	-	-
clfA-all	Clumping Factor A	+	+	+	+	+	+	+
clfA-COL+RF122	Clumping Factor A, allele from RF122	-	-	-	-	-	-	+
clfA-MRSA252	Clumping Factor A, allele from MRSA252	-	-	-	-	-	-	-
clfA-Mu50/MW2	Clumping Factor A, allele from MU50 / MW2	+	+	+	+	+	+	+/-
clfB-all	Clumping Factor B	+	+	+	+	+	+	+
clfB-COL+Mu50	Clumping Factor B, allele from COL / MU 50	-	-	-	-	-	-	+
clfB-MW2	Clumping Factor B, allele from MW2	-	-	-	-	-	-	-
clfB-RF122	Clumping Factor B, allele from RF122	+	+	+	+	+	+	-
cna	Collagen-Binding Adhesin	-	-	-	-	-	-	-
ebh-all	Cell Wall Associated Fibronectin-Binding Protein	+	+	+	+	+	+	+
eno	Enolase, Phosphopyruvate Hydratase	+	+	+	+	+	+	+
fib_all	Fibrinogen Binding Protein	+	+	+	+	+	+	+
fib	Fibrinogen Binding Protein	+	+	+	+	+	+	+
fib-MRSA252	Fibrinogen Binding Protein, allele from MRSA252	-	-	-	-	-	-	-
ebpS	Cell Wall Associated Fibronectin-Binding Protein	+	+	+	+	+	+	+
ebpS-01-1111	Cell Wall Associated Fibronectin-Binding Protein, allele from ST45	-	-	-	-	-	-	-
ebpS-COL	Cell Wall Associated Fibronectin-Binding Protein, allele from COL	+	+	+	+	+	+	+
fnbA-all	Fibronectin-Binding Protein A	+	+	+	+	+	+	+
fnbA-COL	Fibronectin-Binding Protein A, allele from COL	-	-	-	-	-	-	+
fnbA-MRSA252	Fibronectin-Binding Protein A, allele from MRSA252	-	-	-	-	-	-	-
fnbA-Mu50+MW2	Fibronectin-Binding Protein A, allele from MU50 / MW2	-	-	-	-	-	-	-
fnbA-RF122	Fibronectin-Binding Protein A, allele from RF122	-	-	-	-	-	-	-
fnbB-all	Fibronectin-Binding Protein B	+	+	+	+	+	+	+
fnbB-COL	Fibronectin-Binding Protein B, allele from COL	-	-	-	-	-	-	n.d.
fnbB-COL+Mu50+MW2	Fibronectin-Binding Protein B, allele from COL / MU50 / MW2	+	+/-	+/-	+/-	+/-	+/-	+/-
fnbB-Mu50	Fibronectin-Binding Protein B, allele from MU50	+	+	+	+	+	+	-
fnbB-MW2	Fibronectin-Binding Protein B, allele from MW2	-	-	-	-	-	-	-
fnbB-ST15	Fibronectin-Binding Protein B, allele from ST15	-	-	-	-	-	-	-
fnbB-ST45-2	Fibronectin-Binding Protein B, allele from ST45	-	-	-	-	-	-	-
map	Major Histocompatibility Complex Class II Analog Protein	+	+	+	+	+	+	+
map-COL	Major Histocompatibility Complex Class II Analog Protein, allele from RF122	-	-	-	-	-	-	+
map-MRSA252	Major Histocompatibility Complex Class II Analog Protein, allele from MRSA252	-	-	-	-	-	-	-
map-Mu50+MW2	Major Histocompatibility Complex Class II Analog Protein, allele from MU50 / MW2	+	+	+	+	+	+	-
sdrC-all	Ser-Asp Rich Fibrinogen-Binding, Bone Sialoprotein-Binding Protein C	+	+	+	+	+	+	+
sdrC-B1	Ser-Asp Rich Fibrinogen-Binding, Bone Sialoprotein-Binding Protein C, allele from B1	-	-	-	-	-	-	-
sdrC-COL	Ser-Asp Rich Fibrinogen-Binding, Bone Sialoprotein-Binding Protein C, allele from COL	-	-	-	-	-	-	+
sdrC-Mu50	Ser-Asp Rich Fibrinogen-Binding, Bone Sialoprotein-Binding Protein C, allele from MU50	+	+	+	+	+	+	-
sdrC-MW2+MRSA252+RF122	Ser-Asp Rich Fibrinogen-Binding, Bone Sialoprotein-Binding Protein C, allele from MW2 / MRSA252 / RF122	+	+	+	+	+	+	-
sdrC-OtherThan252+122	Ser-Asp Rich Fibrinogen-Binding, Bone Sialoprotein-Binding Protein C, allele from other than MRSA252 / RF122	+	+	+	+	+	+	+
sdrD-all	Ser-Asp Rich Fibrinogen-Binding, Bone Sialoprotein-Binding Protein D							+
sdrD-COL+MW2	Ser-Asp Rich Fibrinogen-Binding, Bone Sialoprotein-Binding Protein D	-	+	+	+	+	+	+
sdrD-Mu50	Ser-Asp Rich Fibrinogen-Binding, Bone Sialoprotein-Binding Protein D, allele from MU50	-	-	-	-	-	-	-
sdrD-other	Ser-Asp Rich Fibrinogen-Binding, Bone Sialoprotein-Binding Protein D, allele from Other	+	-	-	-	-	-	-
sdrD-OtherThan252+122	Ser-Asp Rich Fibrinogen-Binding, Bone Sialoprotein-Binding Protein D, allele from Other Than MRSA252 / RF122	+	+	+	+	+	+	n.d.
vwb-all	Willebrand Factor - Binding Protein	+	+	+	+	+	+	+
vwb-COL+MW2	Willebrand Factor - Binding Protein, allele from COL / MW2	-	-	-	-	-	-	+
vwb-MRSA252	Willebrand Factor - Binding Protein, allele from MRSA252	-	-	-	-	-	-	-
vwb-Mu50	Willebrand Factor - Binding Protein, allele from MU50	+	+	+	+	+	+	-
vwb-RF122	Willebrand Factor - Binding Protein, allele from RF122	-	-	-	-	-	-	-
sasG	S. aureus Surface Protein G	+	+	+	+	+	+	+
sasG-COL+Mu50	S. aureus Surface Protein G, allele from COL / MU50	-	-	-	-	-	-	+
sasG-MW2	S. aureus Surface Protein G, allele from MW2	+	+	+	+	+	+	-
sasG-OtherThan252+122	S. aureus Surface Protein G, allele from other than MRSA252 and RF122	+	+	+	+	+	+	+
Immunevasion & Misc.
isaB_all	Immunodominant Antigen B	+	+	+	+	+	+	+
isaB	Immunodominant Antigen B	+	+/-	+/-	+/-	+	+	+
isaB_MRSA252	Immunodominant Antigen B, allele from MRSA252	+	+	+	+	+/-	+/-	+/-
mprF	Probable Lysylphosphatidylglycerol Synthetase (Defensin Resistance)	+	+	+	+	+	+	+
mprF_COL+MW2	Lysylphosphatidylglycerol Synthetase (Defensin Resistance), allele from COL/MW2	+	+	+	+	+	+	+
mprF_Mu50+252	Lysylphosphatidylglycerol Synthetase (Defensin Resistance), allele from MU50/MRSA252	+	+/-	+/-	+/-	+/-	+/-	-
isdA	Heme/Transferrin-Binding Protein	+	+	+	+	+	+	+
isdA-MRSA252	Heme/Transferrin-Binding Protein, allele from MRSA252	-	-	-	-	-	+/-	-
isdA-OtherThan252	Heme/Transferrin-Binding Protein, allele from OtherThanMRSA252	+	+	+	+	+	+	+
lmrP_all	Putative Transporter Protein	+	+	+	+	+	+	+
lmrP	Putative Transporter Protein	+	+	+	+	+	+	-
lmrP-RF122	Putative Transporter Protein, allele from RF122	-	-	-	-	-	-	-
Q2YUB3	Multidrug Resistance Protein	-	-	-	-	-	+/-	-
hsdS1-RF122	Site-specific Deoxyribonuclease Subunit Type 1, allele from RF122	+	+	+	+	+	+	-
hsdS2_all	Site-specific Deoxyribonuclease Subunit Type 2	-	+/-	+/-	+/-	+/-	+	+
hsdS2-ST5+ST8	Site-specific Deoxyribonuclease Subunit Type 2, allele from ST5 / ST8	-	-	-	-	-	-	+
hsdS2-MW2+476	Site-specific Deoxyribonuclease Subunit Type 2, allele from MW2 / 476	-	+/-	+/-	+/-	+/-	+	-
hsdS2-RF122	Site-specific Deoxyribonuclease Subunit Type 2, allele from FR122	-	-	-	-	-	-	-
hsdS2-MRSA252	Site-specific Deoxyribonuclease Subunit Type 2, allele from MRSA252	-	-	-	-	-	-	-
hsdS3_all	Site-specific Deoxyribonuclease Subunit Type 3	+	+	+	+	+	+	+
hsdS3-AllOtherThanRF122+252	Site-specific Deoxyribonuclease Subunit Type 3, allele from any other than MRSA252 / RF122	+	+	+	+	+	+	+
hsdS3-ST8+ST1+RF122	Site-specific Deoxyribonuclease Subunit Type 3, allele from ST8 / ST1 / RF122	-	-	-	-	-	-	+
hsdS3-Mu50+N315	Site-specific Deoxyribonuclease Subunit Type 3, allele from Mu50 / N315	-	-	-	-	-	-	-
hsdS3-CC51+MRSA252	Site-specific Deoxyribonuclease Subunit Type 3, allele from CC51 / MRSA252	-	-	-	-	-	-	-
hsdS3-MRSA252	Site-specific Deoxyribonuclease Subunit Type 3, allele from MRSA252	+	+	+	+	+	+	-
hsdSx-CC25	Site-specific Deoxyribonuclease Subunit Type X, allele from CC25	+	+	+	+	+	+	+
hsdSx-CC15	Site-specific Deoxyribonuclease Subunit Type X, allele from CC15	-	-	-	-	-	+/-	-
hsdSx-etd	Site-specific Deoxyribonuclease Subunit Type X, allele from etD	-	-	-	-	-	-	-
Q2FXC0	Q2FXC0	-	-	-	-	-	-	+
Q7A4X2	Hypothetical Protein Next To entG	-	-	-	-	-	-	-
hysA1-MRSA252	Hyaluronate Lyase A1_MRSA252	-	-	-	-	-	-	-
hysA1-MRSA252+RF122 and hysA2-all	Hyalunorate Lyase A1, alleles from MRSA252/RF122 and Hyalunorate Lyase A2, all alleles	+	+	+	+	+	+	+
hysA1-MRSA252+RF122 and hysA2-COL+USA300	Hyalunorate Lyase A1, alleles from MRSA252/RF122 and Hyalunorate Lyase A2, all alleles	-	-	-	-	-	-	+
hysA2-AllOtherThan252	Hyaluronate Lyase A2, any other allele than MRSA252	+	+	+	+	+	+	+
hysA2-COL+USA300+NCTC	Hyaluronate Lyase A2_COL/USA300/NCTC8325	-	-	-	-	-	-	+
hysA2-AllOtherThan COL+USA300+NCTC	Hyaluronate Lyase A2, any other allele than COL/USA300/NCTC8325	+	+	+	+	+	+	-
hysA2-MRSA252	Hyaluronate Lyase A2_MRSA252	-	+	+	+	+	+	-
set / ssl Genes
setC/selx	staphylococcal exotoxin-like protein/SAg gene homolog, SAUSA300_0370	+	+	+	+	+	+	+
set6-COL-SACOL468	Staphylococcal Superantigen-Like Protein 6 /SSL1, allele from COL / SCOL468	-	-	-	-	-	-	+
set6-Mu50-SAV0422	Staphylococcal Superantigen-Like Protein 6 /SSL1, allele from Mu50 / SAV0422	-	-	-	-	-	-	+/-
set6-MW2-MW0382	Staphylococcal Superantigen-Like Protein 6 /SSL1, allele from MW2 / MW0382	-	-	-	-	-	-	-
set6-SAR0422-MRSA252	Staphylococcal Superantigen-Like Protein 6 /SSL1, allele from MRSA252-SAR0422	-	-	-	-	-	+	-
set6_All_Others	Staphylococcal Superantigen-Like Protein 6 /SSL1, any other allele	+	+	+	+	+	-	-
set6_RF122	Staphylococcal Superantigen-Like Protein 6 /SSL1 - RF122	-	-	-	-	-	-	-
set7	Staphylococcal Superantigen-Like Protein 7 /SSL2	+	+	+	+	+	+	+
set7_MRSA252	Staphylococcal Superantigen-Like Protein 7 /SSL2, allele from MRSA252-SAR0423	-	-	-	-	-	+/-	-
set8/ssl3	Staphylococcal Superantigen-Like Protein 8 /SSL3	+	+	+	+	+	+	+
set8/ssl3- MRSA252-SAR0424	Staphylococcal Superantigen-Like Protein 8 /SSL3, allele from MRSA252-SAR0424	-	-	-	-	-	-	-
set9/ssl4	Staphylococcal Superantigen-Like Protein 9 /SSL4	+	+	+	+	+	+	+
set9/ssl4 - MRSA252-SAR0425	Staphylococcal Superantigen-Like Protein 9 /SSL4, allele from MRSA252-SAR0425	-	-	-	-	-	-	-
set3/ssl5	Staphylococcal Superantigen-Like Protein 3 /SSL5	+	+	+	+	+	+	+
set3/ssl5 - RF122	Staphylococcal Superantigen-Like Protein 3 /SSL5, allele from RF122	+/-	+/-	+/-	+/-	+/-	+/-	-
set3/ssl5 - MRSA252	Staphylococcal Superantigen-Like Protein 3 /SSL5, allele from MRSA252	-	-	-	-	-	-	-
set21/ssl6	Staphylococcal Superantigen-Like Protein 21 /SSL6	+	+	+	+	+	+	+
set21/ssl6-NCTC / MW2	Staphylococcal Superantigen-Like Protein 21 /SSL6, allele from NCTC8325 / MW2	+	+	+	+	+	+	+
set1/ssl7	Staphylococcal Superantigen-Like Protein 1 /SSL7	+	+	+	+	+	+	+
set1/ssl7-MRSA252	Staphylococcal Superantigen-Like Protein 1 /SSL7, allele from MRSA252	-	+/-	+/-	+/-	+/-	+/-	+/-
set1/ssl7-AF188836	Staphylococcal Superantigen-Like Protein 1 /SSL7, allele from AF188836	-	-	-	-	-	+/-	-
set12/ssl8	Staphylococcal Superantigen-Like Protein 12 /SSL8	+	+	+	+	+	+	+
set5/ssl9	Staphylococcal Superantigen-Like Protein 5 /SSL9	+	+	+	+	+	+	+
set5/ssl9-MRSA252	Staphylococcal Superantigen-Like Protein 5 /SSL9, allele from MRSA252	-	-	-	-	-	-	-
set4/ssl10	Staphylococcal Superantigen-Like Protein 4 /SSL10	+	+	+	+	+	+	+
set4/ssl10-RF122	Staphylococcal Superantigen-Like Protein 4 /SSL10, allele from RF122	-	-	+/-	-	-	+/-	-
set4/ssl10-MRSA252	Staphylococcal Superantigen-Like Protein 4 /SSL10, allele from MRSA252	-	+/-	+/-	+/-	+/-	+/-	-
set2/ssl11-COL	Staphylococcal Superantigen-Like Protein 2 /SSL11, allele from COL	-	-	-	-	-	-	+
set2/ssl11-Mu50/N315	Staphylococcal Superantigen-Like Protein 2 /SSL11, allele from Mu50 / N315	-	-	-	-	-	-	-
set2/ssl11-MW2/MSSA476	Staphylococcal Superantigen-Like Protein 2 /SSL11, allele from MW2/MSSA476	-	-	-	-	-	-	-
set2/ssl11-MRSA252	Staphylococcal Superantigen-Like Protein 2 /SSL11, allele from MRSA252	-	-	-	-	-	+/-	-
setB3	Staphylococcal Superantigen-Like Protein B3	+	+	+	+	+	+	+
setB3-MRSA252	Staphylococcal Superantigen-Like Protein B3, allele from MRSA252	-	-	-	-	-	-	-
setB2	Staphylococcal Superantigen-Like Protein B2	+	+	+	+	+	+	+
setB2-MRSA252	Staphylococcal Superantigen-Like Protein B2, allele from MRSA252	-	-	-	-	-	-	-
setB1	Staphylococcal Superantigen-Like Protein B1	+	+	+	+	+	+	+
